# Supplementary material for: Structural (dys)connectivity associates with cholinergic cell density in Alzheimer’s disease
Source: PubMed Central journal article supplement — Brain. 2022 Mar 8;145(8):2869–81. doi: 10.1093/brain/awac093 (PMC9420016; doi:10.1093/brain/awac093), 2022-03-08
Supplement: awac093_supplementary_data.pdf [file awac093_supplementary_data.pdf]

## Supplementary Materials

### Methods

Immunohistochemistry for cholinergic neurons, amyloid-beta ( $A\beta$ ) and phosphorylated tau (p-tau).

Paraffin-embedded tissue blocks of the NbM were cut at 20  $\mu\text{m}$  (Leica Microtome) for 30 serial sections, and parahippocampal gyrus blocks were cut at 6  $\mu\text{m}$ . All sections were mounted onto glass slides (Thermo Scientific, USA) for subsequent immunohistochemistry with Choline Acetyltransferase (ChAT),  $A\beta$  and p-tau pathology (see Table S2 for detailed information on antibodies).

From the 30 sections of the NbM blocks that were sliced, starting from the first section with visible anterior commissure and substantia innominata, three slides were taken at a distance of 200  $\mu\text{m}$  (e.g., every 1st, 11th and 21th, every 2nd, 12th and 22th, and every 3rd, 13th and 23rd slide) to account for variability within the NbM. These selected sections were deparaffinized and rehydrated in a graded series of xylene and ethanol. Subsequently, the sections underwent antigen retrieval in citrate buffer (pH 6.0) at a temperature of 95°C. Sections were first blocked for endogenous peroxidase by immersing the sections in 1% of  $\text{H}_2\text{O}_2$  in tris-buffered saline (TBS, pH 7.4) for thirty minutes. Subsequently the sections were blocked with 0.1% Triton and 3% normal donkey serum. The NbM sections for ChAT and  $A\beta$  double staining underwent an additional second antigen retrieval step using 80% formic acid for five minutes in the fume hood before the first block. NbM sections were incubated with primary antibodies, ChAT, ChAT/p-tau (AT8) and ChAT/ $A\beta$  (6F/3D), whereas parahippocampal gyrus sections were incubated with p-tau (AT8) and  $A\beta$  (4G8). The incubated primary antibodies were diluted in TBS for two nights at 4°C, followed by Immpress (Vector, California, United State) detection. Finally, ChAT was visualized with 3,3'-Diaminobenzidine (DAB, Dako, Glostrup, Denmark) imidazole (50 mg DAB, 350 mg Imidazole and 30  $\mu\text{L}$  of  $\text{H}_2\text{O}_2$  per 100 mL of Tris-HCl 30mM, pH 7.6), AT8, 6F/3D and 4G8 were visualized using liquid permanent red followed by counter-staining with haematoxylin, and mounting with Entellan.

**Supplementary Table 1. List of automated anatomical labeling (AAL) regions in each lobe.**

| <b>Frontal lobe</b>                     | <b>Temporal lobe</b>                   | <b>Parietal lobe</b>                                              | <b>Occipital lobe</b>                    | <b>Cingulum</b>                         | <b>Insula</b> |
|-----------------------------------------|----------------------------------------|-------------------------------------------------------------------|------------------------------------------|-----------------------------------------|---------------|
| Inferior frontal gyrus, pars orbitalis  | Heschl's gyrus                         | Postcentral gyrus                                                 | Superior occipital gyrus                 | Anterior cingulate & paracingulate gyri |               |
| Superior frontal gyrus, dorsolateral    | Superior temporal gyrus                | Superior parietal gyrus                                           | Middle occipital gyrus                   | Middle cingulate & paracingulate gyri   |               |
| Middle frontal gyrus                    | Middle temporal gyrus                  | Inferior parietal gyrus, excluding supramarginal and angular gyri | Inferior occipital gyrus                 | Posterior cingulate gyrus               |               |
| Inferior frontal gyrus, opercular part  | Inferior temporal gyrus                | SupraMarginal gyrus                                               | Calcarine fissure and surrounding cortex |                                         |               |
| Inferior frontal gyrus, triangular part | Temporal pole: superior temporal gyrus | Angular gyrus                                                     | Cuneus                                   |                                         |               |
| Superior frontal gyrus, medial          | Temporal pole: middle temporal gyrus   | Precuneus                                                         | Lingual gyrus                            |                                         |               |
| Supplementary motor area                | ParaHippocampal gyrus                  |                                                                   |                                          |                                         |               |
| Precentral gyrus                        | Hippocampus                            |                                                                   |                                          |                                         |               |

Note: The AAL regions in each lobe applied to both left and right hemisphere<sup>1</sup>. The orbital part of superior and middle frontal lobe, rectus, olfactory cortex, paracentral lobule and rolandic operum in the frontal lobe, along with fusiform in the temporal lobe were excluded due to their susceptibility to DWI distortions.

**Supplementary Table 2. Information on primary antibodies.**

| <b>Antibody</b>                         | <b>Antigen</b>                                                                                             | <b>Species</b> | <b>Origin details</b>         | <b>Dilution</b> | <b>Incubation time</b> | <b>Antigen retrieval</b>                      | <b>Detection method</b>                                      |
|-----------------------------------------|------------------------------------------------------------------------------------------------------------|----------------|-------------------------------|-----------------|------------------------|-----------------------------------------------|--------------------------------------------------------------|
| <b>ChAT</b>                             | ChAT                                                                                                       | Goat IgG       | Chemicon, Darmstadt, Germany  | 1:200           | 4°C o.n.               | Autoclave (pH 6.0, 10 min)                    | Impress                                                      |
| <b>p-tau, clone AT8</b>                 | Tau phosphorylated at Ser202 and Thr205                                                                    | Mouse IgG1     | ThermoFisher, Pittsburgh, USA | 1:2000          | 4°C o.n.               | Autoclave (pH 6.0, 10 min)                    | Impress for double staining and EnVision for single staining |
| <b>A<math>\beta</math>, clone 6F/3D</b> | A $\beta$ amino acid sequence 8-17 and additional C-terminal cysteine coupled to keyhole limpet hemocyanin | Mouse IgG2b    | Dako, Glostrup, Denmark       | 1:2000          | 4°C o.n.               | Autoclave (pH 6.0, 10 min)                    | Impress                                                      |
| <b>A<math>\beta</math>, clone 4G8</b>   | A $\beta$ amino acid sequence 17-24                                                                        | Mouse IgG2b    | BioLegend, San Diego, USA     | 1:8000          | 4°C o.n.               | Autoclave Citrate buffer (pH 6.0, 10 minutes) | EnVision                                                     |

Abbreviations: ChAT=choline acetyltransferase, p-tau=phosphorylated tau, A $\beta$ =amyloid-beta, o.n.=overnight, pH=potential of hydrogen.

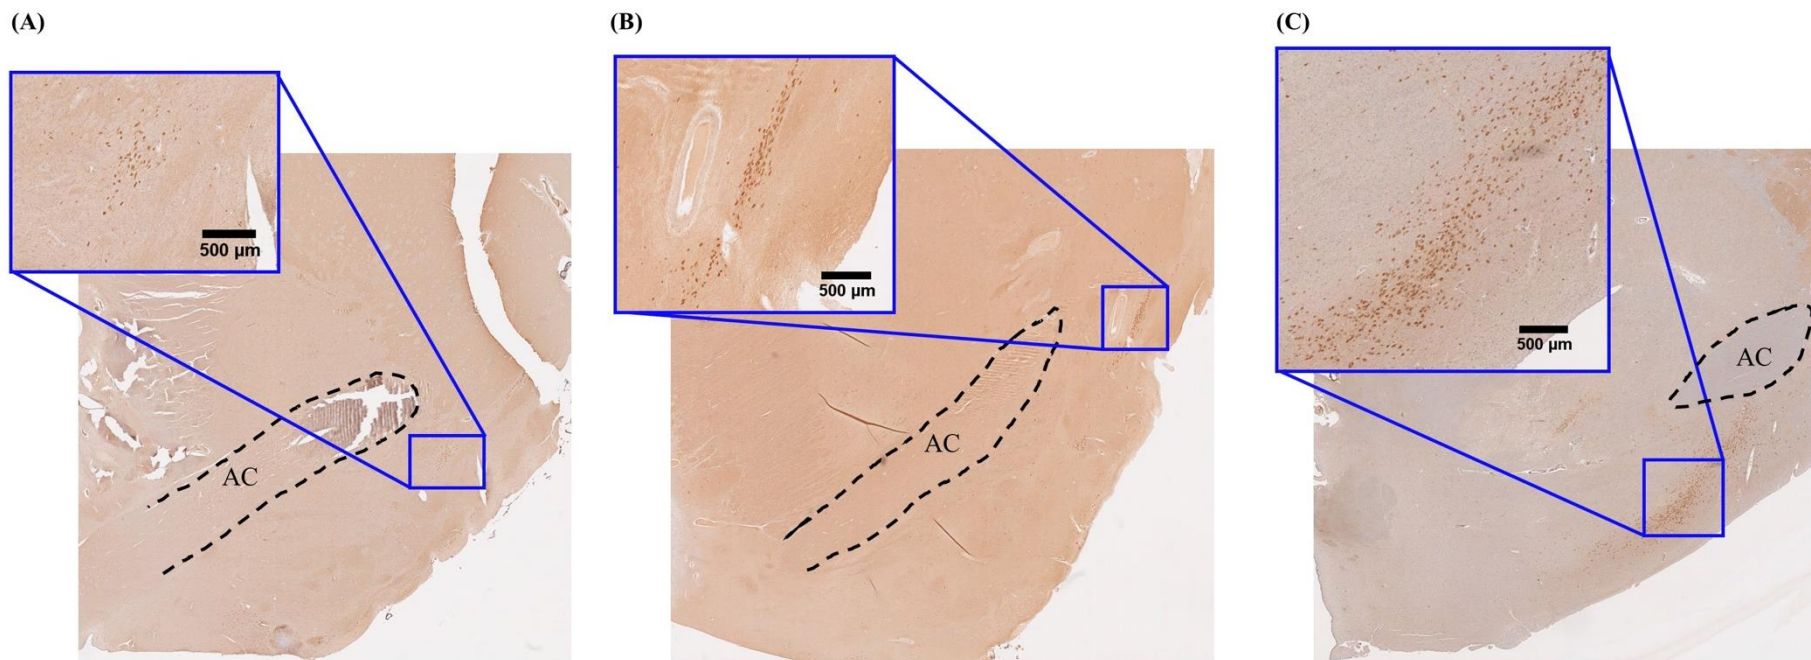

**Supplementary Figure 1. Subsections of the NbM in three control donors.** The pre-anterior NbM of a control (78 year-old) showing ChAT cell reactivity at the lateral aspect and underneath the anterior commissure (AC, black dotted line) shown in (A). Anteromediate NbM of a control (59 year-old) showing ChAT reactivity in a cluster at the lateral side of AC (black dotted line) shown in (B). Antero-intermediate NbM of a control (71 year-old) showing ChAT reactivity in a cluster underneath the AC (black dotted line) shown in (C). Abbreviations:  $\mu\text{m}$ =micron. AC=anterior commissure.

**Supplementary Figure 2. Selection of ChAT reactivity and pathology using automated ImageJ script.**

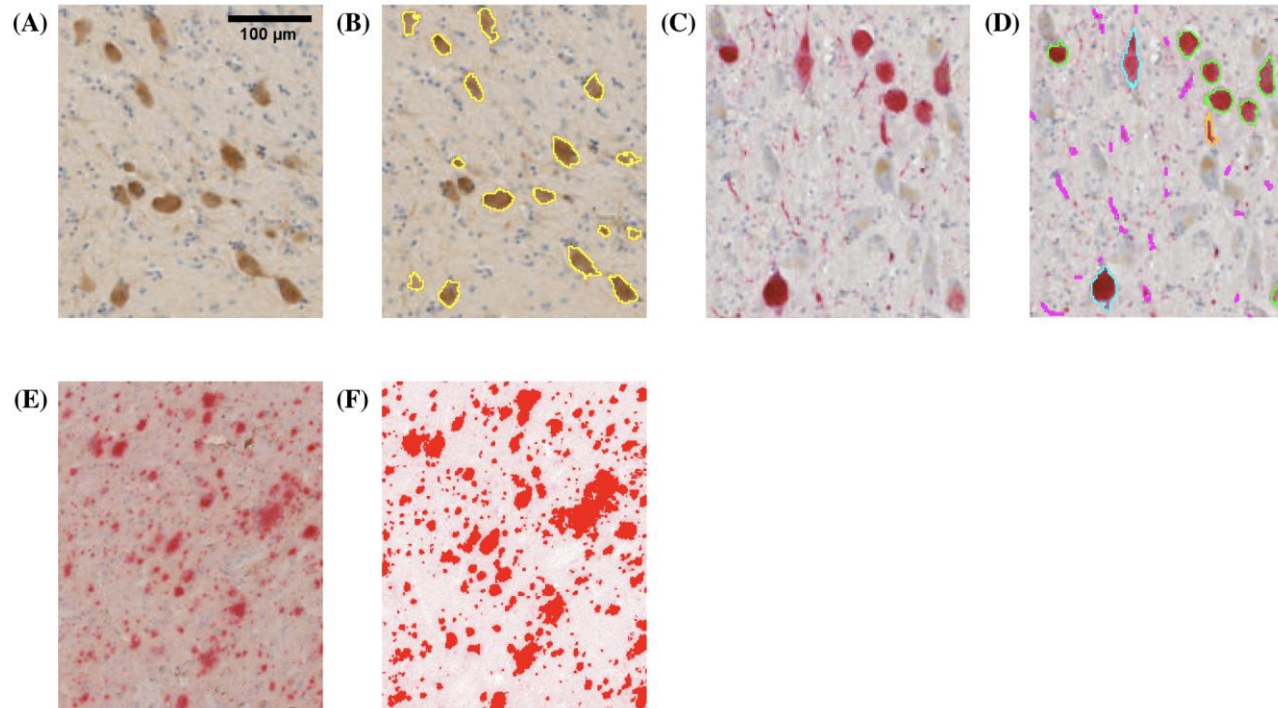

ChAT reactivity shown in brown ellipsoids in (A) were selected and counted for ChAT count, as shown in the yellow outlines in (B). p-tau positivity shown in red in (C) were selected in turquoise, green, orange and magenta as shown in (D) and further measured as percentage surface area for p-tau load. Aβ plaques positivity was measured as percentage surface area for Aβ load, as shown in (E) and (F). The scale bar in (A) applies to all images. Abbreviation: μm=micron.

**Supplementary Table 3. Detailed donor's information**

| Case # | Clinical and cognitive characteristics |              |        |       |                  |     |                                      |                                                |              | Radiological characteristics |          |          |                          |                          | Pathological and genetic characteristics |                              |                  |      |                                                                  |
|--------|----------------------------------------|--------------|--------|-------|------------------|-----|--------------------------------------|------------------------------------------------|--------------|------------------------------|----------|----------|--------------------------|--------------------------|------------------------------------------|------------------------------|------------------|------|------------------------------------------------------------------|
|        | Group                                  | AD subtype   | Gender | Age † | Disease duration | CDR | Dutch Education (level) <sup>2</sup> | Cause †                                        | PMD (hr:min) | NBV(L)                       | NWMV (L) | NGMW (L) | NbM_R (mm <sup>3</sup> ) | NbM_L (mm <sup>3</sup> ) | Thal phase <sup>3</sup>                  | Braak NFT stage <sup>4</sup> | ABC <sup>5</sup> | APOE | CSF markers (ng/L) <sup>*</sup>                                  |
| 1      | AD                                     | Amnestic     | M      | 60    | 2                | 2   | 7                                    | Euthanasia                                     | 8:35         | 1.551                        | 0.787    | 0.763    | 152.36                   | 156.05                   | 5                                        | 6                            | A3 B3 C3         | 33   | Aβ <sup>1-42</sup> : 628 / total tau: 830 / p-tau-181: 102       |
| 2      | AD                                     | Amnestic     | M      | 68    | 6                | 3   | 7                                    | Euthanasia                                     | 9:15         | 1.429                        | 0.711    | 0.718    | 123.39                   | 118.59                   | 5                                        | 5                            | A3 B3 C3         | 33   | NA                                                               |
| 3      | AD                                     | Amnestic     | M      | 69    | 11               | 3   | 6                                    | Respiratory failure due to pulmonary infection | 11:55        | 1.664                        | 0.971    | 0.693    | 86.09                    | 87.30                    | 5                                        | 5                            | A3 B3 C3         | 34   | NA                                                               |
| 4      | AD                                     | Non-amnestic | M      | 65    | 7                | 2   | 6                                    | Cardiac arrest                                 | 7:50         | 1.505                        | 0.732    | 0.774    | 113.37                   | 125.23                   | 4                                        | 5                            | A3 B3 C3         | 33   | NA                                                               |
| 5      | AD                                     | Non-amnestic | M      | 59    | NA               | 2   | NA                                   | Euthanasia                                     | 6:30         | 1.581                        | 0.777    | 0.804    | 74.34                    | 67.33                    | 5                                        | 5                            | A3 B3 C3         | 44   | NA                                                               |
| 6      | AD                                     | Non-amnestic | F      | 78    | 4                | 3   | 5                                    | Cachexia and dehydration                       | 7:30         | 1.359                        | 0.698    | 0.661    | 127.08                   | 111.95                   | 5                                        | 5                            | A3 B3 C3         | 34   | NA                                                               |
| 7      | AD                                     | Amnestic     | M      | 84    | 13               | 1   | 5                                    | Euthanasia                                     | 5:53         | 1.434                        | 0.711    | 0.723    | 98.28                    | 138.37                   | 5                                        | 4                            | A3 B2 C2         | 34   | NA                                                               |
| 8      | AD                                     | Non-amnestic | M      | 62    | 8                | 3   | 6                                    | Palliative sedation                            | 8:15         | 1.155                        | 0.623    | 0.532    | 122.14                   | 118.40                   | 5                                        | 6                            | A3 B3 C3         | 34   | NA                                                               |
| 9      | AD                                     | Non-amnestic | M      | 37    | 5                | 1   | 6                                    | Euthanasia                                     | 11:11        | 1.510                        | 0.779    | 0.732    | 142.03                   | 103.79                   | 5                                        | 6                            | A3 B3 C3         | 23   | Aβ <sup>1-42</sup> (liquor): 349 / total tau 879 / p-tau181: 132 |
| 10     | AD                                     | Amnestic     | F      | 80    | 7                | 1   | 4                                    | Euthanasia                                     | 7:05         | 1.435                        | 0.725    | 0.709    | 164.65                   | 157.99                   | 5                                        | 4                            | A3 B2 C2         | 33   | NA                                                               |
| 11     | AD                                     | Non-amnestic | M      | 67    | 9                | 3   | 7                                    | Cachexia and dehydration                       | 6:35         | 1.254                        | 0.671    | 0.583    | 120.60                   | 105.38                   | 5                                        | 6                            | A3 B3 C3         | 34   | NA                                                               |
| 12     | AD                                     | Non-amnestic | M      | 77    | 4                | 1   | 6                                    | Euthanasia                                     | 7:00         | 1.542                        | 0.769    | 0.774    | 169.63                   | 180.32                   | 5                                        | 4                            | A3 B2 C2         | 34   | Aβ <sup>1-42</sup> : 676 / total-tau: 662 / p-tau181: 85         |
| 13     | AD                                     | Amnestic     | M      | 53    | 5                | 2   | 7                                    | Palliative sedation                            | 9:00         | 1.264                        | 0.668    | 0.596    | 79.11                    | 81.11                    | 5                                        | 6                            | A3 B3 C3         | 33   | Aβ <sup>1-42</sup> : 526 / total-tau: 603 / p-tau181: 84         |
| 14     | AD                                     | Amnestic     | M      | 64    | 12               | 3   | 7                                    | Cachexia and dehydration                       | 7:55         | 1.251                        | 0.683    | 0.568    | 65.70                    | 59.72                    | 5                                        | 6                            | A3 B3 C3         | 34   | NA                                                               |
| 15     | AD                                     | Non-amnestic | M      | 59    | 3                | 3   | 7                                    | Dysphagia                                      | 5:35         | 1.321                        | 0.676    | 0.645    | 69.42                    | 64.08                    | 5                                        | 5                            | A3 B3 C3         | 34   | NA                                                               |
| 16     | AD                                     | Non-amnestic | M      | 73    | 10               | 3   | 4                                    | Cachexia and dehydration                       | 7:20         | 1.366                        | 0.873    | 0.493    | 34.67                    | 40.44                    | 5                                        | 5                            | A3 B3 C3         | 34   | Aβ <sup>1-42</sup> : 514 / total-tau 318 / p-tau-181 44          |
| 17     | AD                                     | Amnestic     | M      | 84    | 23               | 1   | NA                                   | Euthanasia                                     | 8:35         | 1.254                        | 0.642    | 0.612    | 70.99                    | 64.97                    | 3                                        | 4                            | A2 B2 C2         | 33   | NA                                                               |

|    |         |         |   |    |    |    |    |                                       |       |       |       |       |        |        |   |   |          |    |                                                      |
|----|---------|---------|---|----|----|----|----|---------------------------------------|-------|-------|-------|-------|--------|--------|---|---|----------|----|------------------------------------------------------|
| 18 | AD      | Amnesic | M | 77 | 10 | NA | 2  | Suicide by drugs                      | 9:05  | 1.400 | 0.728 | 0.672 | 101.43 | 75.39  | 5 | 6 | A3 B3 C3 | 44 | A $\beta$ 1-42: 389 / total-tau: 455 / p-tau-181: 65 |
| 19 | AD      | Amnesic | M | 65 | 7  | NA | 5  | Euthanasia                            | 9:20  | 1.464 | 0.697 | 0.767 | 97.18  | 79.96  | 5 | 5 | A3 B3 C3 | 34 | NA                                                   |
| 20 | Control | NA      | M | 68 | NA | NA | NA | Euthanasia                            | 8:30  | 1.609 | 0.758 | 0.851 | 153.09 | 161.08 | 2 | 1 | A1 B1 C0 | 34 | NA                                                   |
| 21 | Control | NA      | F | 69 | NA | NA | NA | Pulmonary embolism                    | 12:40 | 1.375 | 0.671 | 0.704 | 182.56 | 244.86 | 1 | 1 | A1 B1 C0 | 33 | NA                                                   |
| 22 | Control | NA      | M | 59 | NA | NA | NA | Euthanasia                            | 8:00  | 1.494 | 0.730 | 0.765 | 151.78 | 154.37 | 2 | 1 | A1 B1 C0 | 34 | NA                                                   |
| 23 | Control | NA      | F | 78 | NA | NA | NA | Unknown                               | 5:25  | 1.516 | 0.738 | 0.777 | 164.08 | 199.24 | 1 | 1 | A1 B1 C0 | 33 | NA                                                   |
| 24 | Control | NA      | F | 59 | NA | NA | NA | Euthanasia                            | 8:10  | 1.460 | 0.677 | 0.783 | 179.02 | 215.40 | 0 | 0 | A0 B0 C0 | 33 | NA                                                   |
| 25 | Control | NA      | F | 71 | NA | NA | NA | Lung carcinoma                        | 6:40  | 1.477 | 0.708 | 0.769 | 178.95 | 141.12 | 2 | 1 | A1 B1 C0 | 34 | NA                                                   |
| 26 | Control | NA      | M | 72 | NA | NA | NA | Hypovolemic shock                     | 8:23  | 1.424 | 0.683 | 0.742 | 155.62 | 140.06 | 1 | 1 | A1 B1 C0 | NA | NA                                                   |
| 27 | Control | NA      | F | 87 | NA | NA | NA | Urinary tract infection               | 8:35  | 1.367 | 0.652 | 0.715 | 131.62 | 145.92 | 0 | 1 | A0 B1 C0 | NA | NA                                                   |
| 28 | Control | NA      | M | 74 | NA | NA | NA | Metastatic neuroendocrine tumor colon | 16:00 | 1.516 | 0.715 | 0.801 | 141.83 | 128.06 | 2 | 0 | A1 B0 C0 | NA | NA                                                   |

Abbreviations: AD= Alzheimer's disease, PMD=post-mortem delay, NBV=normalized brain volume, NWMV=normalized white matter volume, NGMV=normalized grey matter volume, L=liter, F/M=female/male, NFT=neurofibrillary tangle, CDR=clinical dementia rating, A $\beta$ =amyloid-beta, NA=not applicable/available. \*CSF (ng/L) A $\beta$ <sub>1-42</sub> reference > 640 / total tau reference <375 / p-tau-181 reference <52, taken on average 25.7 months before death (range from 3 -53 months).

**Supplementary Table 4. NbM volume difference between ante-mortem and post-mortem scans.**

| AD cases | Scans interval<br>(year) | Ante-mortem volume<br>(mm <sup>3</sup> ) | Post-mortem volume<br>(mm <sup>3</sup> ) | Volume difference*<br>(mm <sup>3</sup> ) |
|----------|--------------------------|------------------------------------------|------------------------------------------|------------------------------------------|
| Case 9   | <1                       | 227,04                                   | 245,81                                   | -18,78 (-8%)                             |
| Case 12  | <1                       | 332,34                                   | 349,95                                   | -17,61 (-5%)                             |
| Case 14  | 10                       | 230,45                                   | 125,42                                   | 105,03 (46%)                             |
| Case 17  | 8                        | 194,64                                   | 135,97                                   | 58,67 (30%)                              |
| Case 19  | <1                       | 186,35                                   | 177,14                                   | 9,21 (5%)                                |

\*Negative volume difference of around ~3-7% could occur due to agonal effects and post-mortem swelling of white matter, as previously described.<sup>6</sup> Abbreviations: AD=Alzheimer's disease



**Supplementary Table 5. Correlations between NbM volumes and the integrity of NbM and cortical tracts.**

|                           | <b>Left hemisphere<br/>NbM volume</b> | <b>Right hemisphere<br/>NbM volume</b> |
|---------------------------|---------------------------------------|----------------------------------------|
| <b>NbM FA</b>             | r=0.22, p= 0.299                      | r=0.25, p= 0.236                       |
| <b>Cingulum tract FA</b>  | r=0.10, p= 0.884                      | r=0.19, p=0.526                        |
| <b>Frontal tract FA</b>   | r= 0.05, p= 0.884                     | r= 0.24, p= 0.402                      |
| <b>Temporal tract FA</b>  | r= 0.03, p= 0.884                     | r= 0.52, p= 0.048*                     |
| <b>Parietal tract FA</b>  | r= 0.20, p= 0.884                     | r= 0.25, p= 0.402                      |
| <b>Occipital tract FA</b> | r= -0.17, p= 0.884                    | r= 0.08, p= 0.692                      |
| <b>Insula tract FA</b>    | r= 0.38, p= 0.564                     | r= 0.27, p= 0.402                      |
| <b>NbM MD</b>             | r= -0.17, p= 0.421                    | r= -0.60, p= 0.001                     |
| <b>Cingulum tract MD</b>  | r= -0.17, p=0.643                     | r= -0.39, p= 0.102                     |
| <b>Frontal tract MD</b>   | r= -0.23, p=0.643                     | r= -0.46, p= 0.023^                    |
| <b>Temporal tract MD</b>  | r= 0.01, p= 0.947                     | r= -0.58, p=0.018*                     |
| <b>Parietal tract MD</b>  | r= 0.18, p=0.643                      | r= -0.43, p= 0.086                     |
| <b>Occipital tract MD</b> | r= 0.16, p=0.643                      | r= -0.40, p= 0.086                     |
| <b>Insula tract MD</b>    | r= -0.30, p=0.643                     | r= -0.35, p= 0.102                     |

Correlations were conducted using partial correlation with age and PMD as covariates. Abbreviations: FA=fractional anisotropy, MD= mean diffusivity, NbM=nucleus basalis of Meynert, r=rho. \*p<0.05, FDR-corrected. ^p<0.05, uncorrected.

**Supplementary Table 6. Mean and standard deviation of tract FA and MD to cortical lobes in AD and controls.**

|                                  | <b>AD (n=19)</b> | <b>Controls (n=9)</b> | <b>p-values</b> |                                 | <b>AD (n=18)</b> | <b>Controls (n=9)</b> | <b>p-values</b> |
|----------------------------------|------------------|-----------------------|-----------------|---------------------------------|------------------|-----------------------|-----------------|
| <b>Right hemisphere tract FA</b> |                  |                       |                 | <b>Left hemisphere tract FA</b> |                  |                       |                 |
| <b>Cingulum</b>                  | 0.464±0.100      | 0.460±0.080           | ns              | <b>Cingulum</b>                 | 0.517±0.097      | 0.470±0.053           | ns              |
| <b>Frontal lobe</b>              | 0.355±0.056      | 0.459±0.097           | ns              | <b>Frontal lobe</b>             | 0.375±0.086      | 0.381±0.082           | ns              |
| <b>Temporal lobe</b>             | 0.371±0.059      | 0.480±0.070           | ns              | <b>Temporal lobe</b>            | 0.370±0.067      | 0.381±0.046           | ns              |
| <b>Parietal lobe</b>             | 0.464±0.036      | 0.358±0.078           | ns              | <b>Parietal lobe</b>            | 0.498±0.045      | 0.515±0.019           | ns              |
| <b>Occipital lobe</b>            | 0.483±0.051      | 0.342±0.052           | ns              | <b>Occipital lobe</b>           | 0.516±0.047      | 0.505±0.029           | ns              |
| <b>Insula</b>                    | 0.326±0.073      | 0.525±0.103           | ns              | <b>Insula</b>                   | 0.313±0.076      | 0.304±0.050           | ns              |
| <b>Right hemisphere tract MD</b> |                  |                       |                 | <b>Left hemisphere tract MD</b> |                  |                       |                 |
| <b>Cingulum</b>                  | 0.457±0.224      | 0.471±0.126           | ns              | <b>Cingulum</b>                 | 0.385±0.079      | 0.396±0.126           | ns              |
| <b>Frontal lobe</b>              | 0.640±0.164      | 0.459±0.097           | ns              | <b>Frontal lobe</b>             | 0.666±0.337      | 0.456±0.139           | ns              |
| <b>Temporal lobe</b>             | 0.583±0.156      | 0.480±0.070           | ns              | <b>Temporal lobe</b>            | 0.680±0.291      | 0.524±0.083           | ns              |
| <b>Parietal lobe</b>             | 0.425±0.151      | 0.358±0.078           | ns              | <b>Parietal lobe</b>            | 0.360±0.096      | 0.337±0.062           | ns              |
| <b>Occipital lobe</b>            | 0.400±0.103      | 0.342±0.052           | ns              | <b>Occipital lobe</b>           | 0.359±0.071      | 0.334±0.070           | ns              |
| <b>Insula</b>                    | 0.709±0.229      | 0.525±0.103           | ns              | <b>Insula</b>                   | 0.746±0.289      | 0.563±0.158           | ns              |

Group comparisons between AD and controls were conducted using GLM and corrected for multiple comparisons. MD reported in MD ( $10^{-3}$  mm<sup>2</sup>/s). Abbreviations: AD=Alzheimer's disease, FA=fractional anisotropy, MD=mean diffusivity, ns=not significant.

**Supplementary Table 7. Means and standard deviations of regional histopathological measures**

|                              |                                         | <b>AD (n=15)</b> | <b>Controls (n=9)</b> | <b>p-values</b> |
|------------------------------|-----------------------------------------|------------------|-----------------------|-----------------|
| <b>NbM</b>                   | <b>ChAT cell density</b>                | 9.92±8.45        | 17.31±27.58           | p=0.434         |
|                              | <b>p-tau load (%area)</b>               | 0.96±1.29        | 0.04±0.04             | p=0.0002***     |
|                              | <b>A<math>\beta</math> load (%area)</b> | 2.10±1.75        | 0.20±0.23             | p=0.002**       |
|                              |                                         | <b>AD (n=15)</b> | <b>Controls (n=6)</b> | <b>p-values</b> |
| <b>Parahippocampal gyrus</b> | <b>p-tau load (%area)</b>               | 52.16±25.46      | 0.38±0.47             | p=0.096         |
|                              | <b>A<math>\beta</math> load (%area)</b> | 5.84±4.05        | 1.72±1.96             | p=0.0004***     |

Group comparisons between AD and controls were conducted using GLM. Abbreviations: AD=Alzheimer's disease, ChAT=choline acetyltransferase, p-tau=phosphorylated-tau, A $\beta$ =amyloid-beta. \*\*p<0.01. \*\*\*p<0.001.

**Supplementary Table 8. Correlations between MRI-derived NbM volume and integrity with histopathological measures.**

|                                         | <b>NbM volume</b>  | <b>NbM FA</b>     | <b>NbM MD</b>       |
|-----------------------------------------|--------------------|-------------------|---------------------|
| <b>ChAT cell density</b>                | r=0.37<br>p=0.112  | r=0.27<br>p=0.246 | r=-0.49<br>p=0.028* |
| <b>A<math>\beta</math> load (%area)</b> | r=-0.20<br>P=0.374 | r=0,09<br>p=0.715 | r=0.04<br>p=0.882   |
| <b>p-tau load (%area)</b>               | r=-0.18<br>p=0.437 | r=0,17<br>p=0.464 | r=-0.12<br>p=0.613  |

Pearson correlation was used to assess the correlations with age, PMD and gender as covariates. Abbreviations: NbM=nucleus basalis of Meynert, r=rho, FA=fractional anisotropy, MD= mean diffusivity, ChAT=cholinergic acetyltransferase, p-tau=phosphorylated-tau, A $\beta$ =amyloid-beta. \*p<0.05.

**Supplementary Table 9. Associations between NbM tract integrity and histopathological measures.**

|                                         | <b>Tract FA</b> |                     |                           |                      |                       |               |
|-----------------------------------------|-----------------|---------------------|---------------------------|----------------------|-----------------------|---------------|
|                                         | <b>Cingulum</b> | <b>Frontal lobe</b> | <b>Temporal lobe</b>      | <b>Parietal lobe</b> | <b>Occipital lobe</b> | <b>Insula</b> |
| <b>ChAT cell density</b>                | p=0.896         | p=0.896             | p=0.896                   | p=0.896              | p=0.896               | p=0.896       |
| <b>A<math>\beta</math> load (%area)</b> | p=0.878         | p=0.878             | p=0.878                   | p=0.878              | p=0.878               | p=0.878       |
| <b>p-tau load (%area)</b>               | p=0.863         | p=0.824             | p=0.824                   | p=0.863              | p=0.863               | p=0.824       |
|                                         | <b>Tract MD</b> |                     |                           |                      |                       |               |
|                                         | <b>Cingulum</b> | <b>Frontal lobe</b> | <b>Temporal lobe</b>      | <b>Parietal lobe</b> | <b>Occipital lobe</b> | <b>Insula</b> |
| <b>ChAT cell density</b>                | p=0.272         | p=0.189             | <b>r= -0.70, p=0.024*</b> | r= -0.75, p=0.057    | p=0.142               | p=0.369       |
| <b>A<math>\beta</math> load (%area)</b> | p=0.501         | p=0.811             | p=0.811                   | p=0.722              | p=0.162               | p=0.811       |
| <b>p-tau load (%area)</b>               | p=0.958         | p=0.870             | p=0.920                   | p=0.870              | p=0.870               | p=0.920       |

Abbreviations: FA=fractional anisotropy, MD=mean diffusivity, ChAT=choline acetyltransferase, A $\beta$ = Amyloid- $\beta$ , p-tau=phosphorylated-tau  
 \*p<0.05, FDR-corrected.

**Supplementary Table 10. Donor characteristics of amnestic and non-amnestic AD.**

|                                                    | <b>Controls</b>  | <b>Amnestic AD</b>   | <b>Non-amnestic AD</b> |
|----------------------------------------------------|------------------|----------------------|------------------------|
| <b>Clinical and cognitive characteristics</b>      |                  |                      |                        |
| <b>N (phenotype)</b>                               | 9                | 10                   | 9 (6 B/D, 3 PCA)       |
| <b>Gender F/M (%M)</b>                             | 4/5 (56%)        | 2/8 (80%)*           | 2/7 (20%)*             |
| <b>Age at death</b><br>years, mean $\pm$ SD        | 70.8 $\pm$ 8.8   | 70.4 $\pm$ 10.5      | 65.4 $\pm$ 12.4        |
| <b>Disease duration</b><br>years, mean $\pm$ SD    | -                | 7.5 $\pm$ 3.8        | 6.9 $\pm$ 3.1          |
| <b>Dutch education (level) N</b><br>2/3/4/5/6/7    | NA               | 9<br>1/0/1/2/1/4     | 8<br>0/0/1/1/4/2       |
| <b>CDR N</b><br>0/1/2/3                            | NA               | 8<br>0/3/2/3         | 9<br>0/2/2/5           |
| <b>PMD, mean (hr:min) <math>\pm</math> SD (hr)</b> | 9:10 $\pm$ 3     | 8:19 $\pm$ 2         | 7:13 $\pm$ 2           |
| <b>Radiological characteristics</b>                |                  |                      |                        |
| <b>NBV (L) mean <math>\pm</math> SD</b>            | 1.46 $\pm$ 0.07  | 1.42 $\pm$ 0.13      | 1.40 $\pm$ 0.14        |
| <b>NGMV (L) mean <math>\pm</math> SD</b>           | 0.70 $\pm$ 0.04  | 0.68 $\pm$ 0.07**    | 0.67 $\pm$ 0.11*       |
| <b>NWMV (L) mean <math>\pm</math> SD</b>           | 0.79 $\pm$ 0.04  | 0.73 $\pm$ 0.09      | 0.73 $\pm$ 0.08        |
| <b>Pathological and genetic characteristics</b>    |                  |                      |                        |
| <b>Thal phase N</b><br>0/1/2/3/4/5                 | 9<br>2/3/3/1/0/0 | 10***<br>0/0/0/1/0/9 | 9***<br>0/0/0/0/1/8    |

|                          |               |               |               |
|--------------------------|---------------|---------------|---------------|
| <b>Braak NFT stage N</b> | 9             | 10***         | 9***          |
| 0/1/2/3/4/5/6            | 1/7/1/0/0/0/0 | 0/0/0/0/3/3/4 | 0/0/0/0/1/5/3 |
| <b>ABC score N</b>       | 9             | 10**          | 9**           |
| A 0/1/2/3                | 2/6/1/0       | 0/0/0/10      | 0/0/0/9       |
| B 0/1/2/3                | 1/8/0/0       | 0/0/3/7       | 0/0/1/8       |
| C 0/1/2/3                | 9/0/0/0       | 0/0/3/7       | 0/0/1/8       |
| <b>APOE genotype N</b>   | 8             | 10            | 9             |
| ε4 non-carrier           | 5 (56%)       | 5 (50%)       | 2 (22%)       |
| ε4 heterozygous          | 3 (44%)       | 4 (40%)       | 6 (67%)       |
| ε4 homozygous            | 0             | 1 (10%)       | 1 (11%)       |

Abbreviations: B/D=behavioral/dysexecutive variant, PCA=posterior cortical atrophy, F/M= female/male ratio, CDR=clinical dementia rating, SD=standard deviation, N=sample size, L=liter, NBV=normalized brain volume, NWM=normalized white matter volume, NGMV=normalized grey matter volume, NFT=neurofibrillary tangles, NA=not available. \*p<0.05, compared to controls. \*\*p<0.01, compared to controls. \*\*\*p=0.001, compared to controls.

**Supplementary Table 11. Group comparisons of MRI and histopathological measures between amnestic and non-amnestic AD.**

|                                  | <b>Controls (n=9)</b> | <b>Amnestic AD (n=10)</b> | <b>Non-amnestic AD (n=9)</b> | <b>Each subtype compares to controls and p-values</b> | <b>Compare between subtypes and p-values</b> |
|----------------------------------|-----------------------|---------------------------|------------------------------|-------------------------------------------------------|----------------------------------------------|
| <b>NbM volumes</b>               |                       |                           |                              |                                                       |                                              |
| <b>Right</b>                     | 159.8±17.7            | 103.9±33.3                | 108.4±41.4                   | Controls>Amnestic, p=0.018 <sup>^</sup>               | ns                                           |
| <b>Left</b>                      | 170.0±40.2            | 101.9±37.5                | 109.6±36.3                   | Controls>Amnestic, p=0.029 <sup>^</sup>               | ns                                           |
| <b>NbM FA</b>                    |                       |                           |                              |                                                       |                                              |
| <b>Right</b>                     | 0.443±0.079           | 0.437±0.102               | 0.400±0.106                  | ns                                                    | ns                                           |
| <b>Left</b>                      | 0.448±0.131           | 0.399±0.132               | 0.444±0.097                  | ns                                                    | ns                                           |
| <b>NbM MD</b>                    |                       |                           |                              |                                                       |                                              |
| <b>Right</b>                     | 0.407±0.048           | 0.437±0.102               | 0.463±0.144                  | ns                                                    | ns                                           |
| <b>Left</b>                      | 0.389±0.090           | 0.399±0.132               | 0.384±0.041                  | ns                                                    | ns                                           |
| <b>Right hemisphere tract FA</b> |                       |                           |                              |                                                       |                                              |
| <b>Cingulum</b>                  | 0.460±0.080           | 0.488±0.049               | 0.440±0.133                  | ns                                                    | ns                                           |
| <b>Frontal lobe</b>              | 0.459±0.097           | 0.355±0.054               | 0.356±0.062                  | ns                                                    | ns                                           |
| <b>Temporal lobe</b>             | 0.480±0.070           | 0.397±0.052               | 0.343±0.056                  | Amnestic>Controls, p=0.063 <sup>^</sup>               | Amnestic>Non-amnestic, p=0.036*              |
| <b>Parietal lobe</b>             | 0.358±0.078           | 0.452±0.033               | 0.482±0.035                  | ns                                                    | ns                                           |
| <b>Occipital lobe</b>            | 0.342±0.052           | 0.483±0.029               | 0.483±0.075                  | ns                                                    | ns                                           |
| <b>Insula</b>                    | 0.525±0.103           | 0.360±0.077               | 0.288±0.049                  | ns                                                    | Amnestic>Non-amnestic, p=0.026 <sup>^</sup>  |
| <b>Right hemisphere tract MD</b> |                       |                           |                              |                                                       |                                              |
| <b>Cingulum</b>                  | 0.471±0.126           | 0.491±0.294               | 0.423±0.135                  | ns                                                    | ns                                           |
| <b>Frontal lobe</b>              | 0.459±0.097           | 0.666±0.149               | 0.613±0.183                  | ns                                                    | ns                                           |
| <b>Temporal lobe</b>             | 0.480±0.070           | 0.537±0.155               | 0.634±0.150                  | ns                                                    | ns                                           |
| <b>Parietal lobe</b>             | 0.358±0.078           | 0.463±0.182               | 0.372±0.075                  | ns                                                    | ns                                           |
| <b>Occipital lobe</b>            | 0.342±0.052           | 0.422±0.109               | 0.369±0.091                  | ns                                                    | ns                                           |
| <b>Insula</b>                    | 0.525±0.103           | 0.621±0.184               | 0.807±0.243                  | ns                                                    | Amnestic>Non-amnestic, p=0.038 <sup>^</sup>  |



|                          | <b>Controls (n=9)</b> | <b>Amnestic AD (n=8)</b> | <b>Non-amnestic AD (n=7)</b> |                                                                  |    |
|--------------------------|-----------------------|--------------------------|------------------------------|------------------------------------------------------------------|----|
|                          |                       |                          |                              | <b>Histopathological load</b>                                    |    |
| <b>ChAT cell density</b> | 17.31±27.58           | 9.73±6.62                | 10.14±10.75                  | ns                                                               | ns |
| <b>Tau load (%area)</b>  | 0.04±0.04             | 1.26±1.69                | 0.63±0.58                    | Amnestic>Controls, p=0.001**;<br>Non-amnestic>Controls, p=0.018* | ns |
| <b>Aβ load (%area)</b>   | 0.20±0.23             | 2.60±1.92                | 1.53±1.46                    | Amnestic>Controls, p=0.006**                                     | ns |

Group comparisons were performed with general linear model with age and post-mortem delay as covariates. MD reported in MD ( $10^{-3}$  mm<sup>2</sup>/s). Abbreviations: AD=Alzheimer's disease, NbM=nucleus basalis of Meynert, FA=fractional anisotropy, MD=mean diffusivity, ChAT=cholinergic acetyltransferase, p-tau=phosphorylated-tau, Aβ=amyloid-beta, ns=not significant. \*p<0.05, FDR-corrected. \*\*p≤0.001, FDR-corrected. ^p<0.05, uncorrected.

**Supplementary Table 12. Associations between tract integrity in cortical lobes and histopathological measures in amnestic and non-amnestic AD.**

| <b>MRI-path association in amnestic AD</b>     |                 |                     |                      |                      |                       |               |
|------------------------------------------------|-----------------|---------------------|----------------------|----------------------|-----------------------|---------------|
| <b>Tract FA</b>                                |                 |                     |                      |                      |                       |               |
|                                                | <b>Cingulum</b> | <b>Frontal lobe</b> | <b>Temporal lobe</b> | <b>Parietal lobe</b> | <b>Occipital lobe</b> | <b>Insula</b> |
| <b>ChAT cell density</b>                       | p=0.520         | p=0.628             | p=0.520              | p=0.520              | p=0.628               | p=0.628       |
| <b>A<math>\beta</math> load (%area)</b>        | p=0.879         | p=0.330             | p=0.689              | p=0.879              | p=0.650               | p=0.650       |
| <b>p-tau load (%area)</b>                      | p=0.769         | p=0.769             | r= 0.89, p=0.018*    | p=0.462              | p=0.769               | p=0.057       |
| <b>Tract MD</b>                                |                 |                     |                      |                      |                       |               |
|                                                | <b>Cingulum</b> | <b>Frontal lobe</b> | <b>Temporal lobe</b> | <b>Parietal lobe</b> | <b>Occipital lobe</b> | <b>Insula</b> |
| <b>ChAT cell density</b>                       | p=0.075         | r= -0.89, p=0.024*  | r= -0.89, p=0.018*   | r= -0.79, p=0.040*   | p=0.241               | p=0.560       |
| <b>A<math>\beta</math> load (%area)</b>        | p=0.977         | p=0.977             | p=0.977              | p=0.977              | p=0.977               | p=0.977       |
| <b>p-tau load (%area)</b>                      | p=0.923         | p=0.923             | p=0.923              | p=0.923              | p=0.923               | p=0.534       |
| <b>MRI-path association in non-amnestic AD</b> |                 |                     |                      |                      |                       |               |
| <b>Tract FA</b>                                |                 |                     |                      |                      |                       |               |
|                                                | <b>Cingulum</b> | <b>Frontal lobe</b> | <b>Temporal lobe</b> | <b>Parietal lobe</b> | <b>Occipital lobe</b> | <b>Insula</b> |
| <b>ChAT cell density</b>                       | p=0.786         | p=0.786             | p=0.839              | p=0.839              | p=0.786               | p=0.839       |
| <b>A<math>\beta</math> load (%area)</b>        | p=0.844         | p=0.844             | p=0.844              | p=0.844              | p=0.844               | p=0.844       |
| <b>p-tau load (%area)</b>                      | p=0.827         | p=0.827             | p=0.827              | p=0.827              | p=0.827               | p=0.570       |
| <b>Tract MD</b>                                |                 |                     |                      |                      |                       |               |
|                                                | <b>Cingulum</b> | <b>Frontal lobe</b> | <b>Temporal lobe</b> | <b>Parietal lobe</b> | <b>Occipital lobe</b> | <b>Insula</b> |
| <b>ChAT cell density</b>                       | p=0.955         | p=0.955             | p=0.955              | p=0.955              | p=0.955               | p=0.955       |
| <b>A<math>\beta</math> load (%area)</b>        | p=0.612         | p=0.634             | p=0.634              | p=0.612              | p=0.612               | p=0.634       |
| <b>p-tau load (%area)</b>                      | p=0.864         | p=0.864             | p=0.916              | p=0.864              | p=0.864               | p=0.864       |

Abbreviations: AD=Alzheimer's disease, FA=fractional anisotropy, MD=mean diffusivity, ChAT=cholinergic acetyltransferase, p-tau=phosphorylated-tau, A $\beta$ =amyloid-beta. \*p<0.05, FDR-corrected.

## References

1. Rolls ET, Huang CC, Lin CP, Feng J, Joliot M. Automated anatomical labelling atlas 3. *Neuroimage*. 2020;206. doi:10.1016/j.neuroimage.2019.116189
2. Verhage F. Intelligentie en leeftijd: onderzoek bij Nederlanders van twaalf tot zeventien jaar [Intelligence and Age: study with Dutch people aged 12 to 17]. *Assen Van Gorcum*. Published online 1964.
3. Thal DR, Rüb U, Orantes M, Braak H. Phases of A $\beta$ -deposition in the human brain and its relevance for the development of AD. *Neurology*. 2002;58(12). doi:10.1212/WNL.58.12.1791
4. Braak H, Braak E. Neuropathological staging of Alzheimer-related changes. *Acta Neuropathol*. 1991;82(4). doi:10.1007/BF00308809
5. Montine TJ, Phelps CH, Beach TG, et al. National institute on aging-Alzheimer's association guidelines for the neuropathologic assessment of Alzheimer's disease: A practical approach. *Acta Neuropathol*. 2012;123(1). doi:10.1007/s00401-011-0910-3
6. Boon BDC, Pouwels PJW, Jonkman LE, et al. Can post-mortem MRI be used as a proxy for in vivo? A case study. *Brain Commun*. 2019;1(1). doi:10.1093/braincomms/fcz030
